# Supplementary material
Source: PubMed Central journal article supplement (PMC8173778)
Supplement: mmc1.pdf [file mmc1.pdf]

## Diffusing Capacity Is an Independent Predictor of Outcomes in Pulmonary Hypertension Associated With COPD

*Aparna Balasubramanian, MD; Todd M. Kolb, MD, PhD; Rachel L. Damico, MD, PhD; Paul M. Hassoun, MD; Meredith C. McCormack, MD; and Stephen C. Mathai, MD*

CHEST 2020; 158(2):722-734

*Online supplements are not copyedited prior to posting and the author(s) take full responsibility for the accuracy of all data.*

© 2020 AMERICAN COLLEGE OF CHEST PHYSICIANS. Reproduction of this article is prohibited without written permission from the American College of Chest Physicians. See online for more details. DOI: 10.1016/j.chest.2020.02.047

**e-Table 1.** Clinical characteristics of those missing DLCO data

|                                                  | DLCO>50%<br>(N=20) | DLCO≤50%<br>(N=40) | Missing DLCO<br>(N=11) |
|--------------------------------------------------|--------------------|--------------------|------------------------|
| Age at diagnosis                                 | 65.4 +/- 8.8       | 64.9 +/- 8.3       | 64.6 +/- 10.4          |
| Caucasian, N (%)                                 | 16 (80)            | 26 (65)            | 7 (64)                 |
| % Female, N (%)                                  | 14 (70)            | 27 (68)            | 8 (73)                 |
| BMI (kg/m <sup>2</sup> )                         | 30.1 +/- 7.9       | 25.9 +/- 5.5       | <b>32 +/- 5.7</b>      |
| Ever Smokers, N (%)                              | 17 (85)            | 38 (95)            | 11(100)                |
| Current smoker, N (%)                            | 3 (15)             | 3 (7.5)            | 1 (9)                  |
| Smoking Pack years                               | 36.9 +/- 28.7      | 47.1 +/- 28        | 46 +/- 25.6            |
| Oxygen use, N (%)                                | 11 (55)            | 33 (83)            | 8 (72)                 |
| Nadir Oxygen Saturation %                        | 89.6 +/- 7.5       | 80.5 +/- 8.4       | 85 +/- 8               |
| NYHA class, N (%)                                |                    |                    |                        |
| Class I                                          | 1 (5.3)            | 1 (2.6)            | 0 (0)                  |
| Class II                                         | 11 (57.9)          | 12 (30.8)          | 4 (36)                 |
| Class III                                        | 6 (31.6)           | 21 (53.9)          | 4 (36)                 |
| Class IV                                         | 1 (5.3)            | 5 (12.8)           | <b>3 (27)</b>          |
| 6MWD (m)*                                        | 314 +/- 128        | 251 +/- 110        | <b>191 +/- 126</b>     |
| Borg Dyspnea                                     | 2.9 +/- 1.4        | 5.2 +/- 2.5        | <b>5.4 +/- 2.9</b>     |
| NT-proBNP, median (IQR)<br>pg/mL                 | 229 (176, 311)     | 1311 (314, 2176)   | 771 (526, 1852)        |
| Cr (mg/dL)                                       | 1.0 (0.3)          | 1.1 (0.4)          | 0.96 (0.2)             |
| eGFR, median (IQR)<br>mL/min/1.73 m <sup>2</sup> | 60 (60, 60)        | 60 (46, 60)        | 60 (60, 60)            |
| FEV1 % predicted                                 | 56 +/- 21          | 51 +/- 20          | <b>43 +/- 16</b>       |
| FVC % predicted                                  | 77 +/- 25          | 73 +/- 20          | <b>58 +/- 11</b>       |
| FEV1/FVC %                                       | 57 +/- 17          | 57 +/- 12          | 57 +/- 13              |
| TLC % predicted*                                 | 94 +/- 33          | 91 +/- 19          | 76 +/- 12** (N=4)      |
| RV % predicted*                                  | 119 +/- 48         | 121 +/- 55         | 91 +/- 9               |
| DLCO % predicted                                 | 67 +/- 15          | 32 +/- 10          | --                     |
| DLCO/VA % predicted                              | 81 +/- 27          | 44 +/- 18          | --                     |
| PH Medication use, N (%)                         | 13 (65)            | 28 (70)            | 7 (64)                 |
| Comorbidities, N (%)                             |                    |                    |                        |
| Atrial Fibrillation/Flutter                      | 1 (5)              | 9 (23)             | 0(0)                   |
| Coronary Artery Disease                          | 4 (20)             | 12 (30)            | 2(18)                  |
| Cancer                                           | 3 (15)             | 7 (18)             | 3 (27)                 |
| DVT/PE                                           | 2 (10)             | 6 (15)             | 0 (0)                  |
| Congestive Heart Failure                         | 1 (5)              | 3 (8)              | 1 (9)                  |
| ILD                                              | 2 (10)             | 4 (10)             | 2 (18)                 |
| OSA                                              | 5 (25)             | 4 (10)             | 5 (45)                 |
| RAP (mmHg)                                       | 8.3 +/- 4.2        | 9.4 +/- 5.1        | 10 +/- 5               |
| mPAP (mmHg)                                      | 41.1 +/- 13.7      | 45.8 +/- 1.8       | 43 +/- 10              |
| PCWP (mmHg)                                      | 14.9 +/- 6.8       | 12.9 +/- 6.5       | 17 +/- 7               |
| Cardiac Index (L/min/m <sup>2</sup> )            | 2.7 +/- 0.6        | 2.1 +/- 0.6        | 2.2 +/- 0.5            |
| PVR (Wood units)                                 | 6.2 +/- 5.1        | 9.7 +/- 5.1        | 7.9 +/- 4.2            |
| PA Saturation %                                  | 69 +/- 9           | 64 +/- 8           | 67 +/- 4               |
| Died at 5 years, N(%)                            | 11 (55)            | 30 (75)            | 6 (55)                 |

**e-Table 2.** Unadjusted and Adjusted Transplant-Free Survival including those with DLCO outside 1-year window

|                                | Unadjusted HR              | p-value       | Model 1                    | p-value       | Model 2                    | p-value       | Model 3                    | p-value      |
|--------------------------------|----------------------------|---------------|----------------------------|---------------|----------------------------|---------------|----------------------------|--------------|
| Age at diagnosis               | 1.02 (0.98 – 1.06)         | 0.38          | 1.04 (0.99 – 1.09)         | 0.09          | 1.05 (0.99 – 1.09)         | 0.06          | 1.03 (0.98 – 1.08)         | 0.27         |
| Sex                            | 0.73 (0.36 – 1.48)         | 0.39          | --                         | --            | --                         | --            | --                         | --           |
| BMI (kg/m <sup>2</sup> )       | 0.95 (0.88 – 1.02)         | 0.16          | --                         | --            | --                         | --            | --                         | --           |
| Smoking Pack years             | 1.01 (0.99 – 1.02)         | 0.06          | --                         | --            | --                         | --            | --                         | --           |
| 6MWD (m)                       | 0.99 (0.99 – 0.99)*        | 0.048*        | --                         | --            | --                         | --            | --                         | --           |
| Borg Dyspnea                   | 1.09 (0.93 – 1.28)         | 0.29          | --                         | --            | --                         | --            | --                         | --           |
| Oxygen Use                     | 2.90 (1.12 – 7.51)*        | 0.028*        | --                         | --            | 1.62 (0.57 – 4.59)         | 0.37          | --                         | --           |
| FEV1 % predicted               | 1.00 (0.98 – 1.02)         | 0.65          | 0.99 (0.98 – 1.02)         | 0.95          | --                         | --            | --                         | --           |
| FVC % predicted                | 1.00 (0.99 – 1.02)         | 0.83          | --                         | --            | --                         | --            | --                         | --           |
| FEV1/FVC %                     | 1.01 (0.99 – 1.04)         | 0.33          | --                         | --            | --                         | --            | --                         | --           |
| RV % predicted                 | 0.99 (0.99 – 1.00)         | 0.19          | --                         | --            | --                         | --            | --                         | --           |
| <b>DLCO % predicted</b>        | <b>0.96 (0.94 – 0.98)*</b> | <b>0.002*</b> | <b>0.96 (0.93 – 0.98)*</b> | <b>0.002*</b> | <b>0.96 (0.94 – 0.99)*</b> | <b>0.005*</b> | <b>0.96 (0.94 – 0.99)*</b> | <b>0.03*</b> |
| NT-proBNP <sup>†</sup> (pg/mL) | 2.51 (1.32 – 4.79)*        | 0.005*        | --                         | --            | --                         | --            | 1.24 (0.57 – 2.67)         | 0.59         |
| Cr (mg/dL)                     | 1.36 (0.46 – 4.09)         | 0.58          | --                         | --            | --                         | --            | --                         | --           |
| mPAP (mmHg)                    | 1.02 (1.00 – 1.06)*        | 0.03*         | --                         | --            | --                         | --            | --                         | --           |
| PVR (Wood units)               | 1.07 (1.01 – 1.14)*        | 0.02*         | 1.04 (0.97 – 1.13)         | 0.27          | 1.04 (0.97 – 1.13)         | 0.26          | 1.05 (0.96 – 1.14)         | 0.31         |
| Cardiac Output (L/min)         | 0.76 (0.58 – 0.99)*        | 0.045*        | --                         | --            | --                         | --            | --                         | --           |
| PCWP (mmHg)                    | 0.95 (0.89 – 1.02)         | 0.15          | --                         | --            | --                         | --            | --                         | --           |
| PH Medication Use              | 1.85 (0.84 – 4.09)         | 0.13          | --                         | --            | --                         | --            | --                         | --           |

Model 1 (N=58) included age at diagnosis, FEV1% predicted, DLCO% predicted, and PVR as covariates. Model 2 (N=58) included age at diagnosis, oxygen use, DLCO % predicted, and PVR as covariates. Model 3 (N=44) included age at diagnosis, DLCO % predicted, NT-proBNP, and PVR as covariates.

\*Denotes statistical significance  $p < 0.05$ . <sup>†</sup>NT-proBNP was log<sub>10</sub>-transformed for normality. Hazard ratios are reported per 1 unit increase in clinical predictor; sex hazard ratio is for females vs males, NT-proBNP is per 10 fold increase in pg/mL. HR = hazard ratio, BMI = body mass index, 6MWD = six-minute walk distance, FEV1 = forced expiratory volume in 1 second, FVC = forced vital capacity, RV = residual volume, DLCO = diffusing capacity of the lung for carbon monoxide, Cr = creatinine, mPAP = mean pulmonary arterial pressure, PVR = pulmonary vascular resistance, PCWP = pulmonary capillary wedge pressure, PH = pulmonary hypertension

**e-Table 3.** Unadjusted and Adjusted Survival excluding “pulmonary vascular phenotype” patients

|                                | Unadjusted HR              | p-value           | Model 1                    | p-value       | Model 2                    | p-value       | Model 3                    | p-value       |
|--------------------------------|----------------------------|-------------------|----------------------------|---------------|----------------------------|---------------|----------------------------|---------------|
| Age at diagnosis               | 1.01 (0.97 – 1.05)         | 0.69              | 0.99 (0.95 – 1.05)         | 0.93          | 1.02 (0.96 – 1.07)         | 0.56          | 0.99 (0.94 – 1.05)         | 0.83          |
| Sex                            | 0.62 (0.29 – 1.31)         | 0.21              | --                         | --            | --                         | --            | --                         | --            |
| BMI (kg/m <sup>2</sup> )       | 0.95 (0.87 – 1.03)         | 0.18              | --                         | --            | --                         | --            | --                         | --            |
| Smoking Pack years             | 1.01 (1.00 – 1.03)*        | 0.02*             | --                         | --            | --                         | --            | --                         | --            |
| 6MWD (m)                       | 0.99 (0.99 – 0.99)*        | 0.049*            | --                         | --            | --                         | --            | --                         | --            |
| Borg Dyspnea                   | 1.07 (0.89 – 1.27)         | 0.47              | --                         | --            | --                         | --            | --                         | --            |
| Oxygen Use                     | 3.66 (1.28 – 10.5)*        | 0.016*            | --                         | --            | 1.24 (0.41 – 3.75)         | 0.71          | --                         | --            |
| FEV1 % predicted               | 1.00 (0.98 – 1.02)         | 0.73              | 1.01 (0.99 – 1.04)         | 0.21          | --                         | --            | --                         | --            |
| FVC % predicted                | 1.00 (0.98 – 1.02)         | 0.89              | --                         | --            | --                         | --            | --                         | --            |
| FEV1/FVC %                     | 1.01 (0.99 – 1.04)         | 0.35              | --                         | --            | --                         | --            | --                         | --            |
| RV % predicted                 | 0.99 (0.99 – 1.00)         | 0.34              | --                         | --            | --                         | --            | --                         | --            |
| <b>DLCO % predicted</b>        | <b>0.95 (0.92 – 0.97)*</b> | <b>&lt;0.001*</b> | <b>0.95 (0.92 – 0.98)*</b> | <b>0.002*</b> | <b>0.96 (0.93 – 0.98)*</b> | <b>0.005*</b> | <b>0.96 (0.93 – 0.99)*</b> | <b>0.008*</b> |
| NT-proBNP <sup>†</sup> (pg/mL) | 1.39 (1.04 – 1.85)*        | 0.03*             | --                         | --            | --                         | --            | 1.02 (0.47 – 2.2)          | 0.95          |
| Cr (mg/dL)                     | 1.75 (0.51 – 6.07)         | 0.38              | --                         | --            | --                         | --            | --                         | --            |
| mPAP (mmHg)                    | 1.04 (1.01 – 1.07)*        | 0.007*            | --                         | --            | --                         | --            | --                         | --            |
| PVR (Wood units)               | 1.11 (1.03 – 1.18)*        | 0.002*            | 1.06 (0.98 – 1.15)         | 0.12          | 1.07 (0.98 – 1.16)         | 0.09          | 1.10 (1.00 – 1.21)         | 0.047*        |
| Cardiac Output (L/min)         | 0.69 (0.51 – 0.95)*        | 0.022*            | --                         | --            | --                         | --            | --                         | --            |
| PCWP (mmHg)                    | 0.94 (0.88 – 1.01)         | 0.11              | --                         | --            | --                         | --            | --                         | --            |
| PH Medication Use              | 1.94 (0.83 – 4.52)         | 0.13              | --                         | --            | --                         | --            | --                         | --            |

Model 1 (N=49) included age at diagnosis, FEV1% predicted, DLCO% predicted, and PVR as covariates. Model 2 (N=49) included age at diagnosis, oxygen use, DLCO % predicted, and PVR as covariates. Model 3 (N=36) included age at diagnosis, DLCO % predicted, NT-proBNP, and PVR as covariates.

\*Denotes statistical significance  $p < 0.05$ . <sup>†</sup>NT-proBNP was log<sub>10</sub>-transformed for normality. Hazard ratios are reported per 1 unit increase in clinical predictor; sex hazard ratio is for females vs males, NT-proBNP is per 10 fold increase in pg/mL. HR = hazard ratio, BMI = body mass index, 6MWD = six-minute walk distance, FEV1 = forced expiratory volume in 1 second, FVC = forced vital capacity, RV = residual volume, DLCO = diffusing capacity of the lung for carbon monoxide, Cr = creatinine, mPAP = mean pulmonary arterial pressure, PVR = pulmonary vascular resistance, PCWP = pulmonary capillary wedge pressure, PH = pulmonary hypertension

**e-Table 4.** Cause of Death

| <b>Cause of Death</b>   | <b>N (%)</b> |
|-------------------------|--------------|
| Respiratory Failure     | 10 (38%)     |
| Sudden Cardiac Death    | 5 (19%)      |
| Transplant              | 3 (11%)      |
| Coronary Artery Disease | 3 (11%)      |
| Lung Cancer             | 2 (8%)       |
| Sepsis                  | 2 (8%)       |
| Gastrointestinal Bleed  | 1 (4%)       |

Cause of death was obtained in 23 individuals (68% of those that died), with an additional three undergoing lung transplantation. Percentages listed above are among the 26 with a death or transplant event with known etiology.

**e-Table 5.** Unadjusted and Adjusted Transplant-free Survival using KCO % predicted

|                                | Unadjusted HR              | p-value       | Model 1                   | p-value     | Model 2                   | p-value      | Model 3                    | p-value      |
|--------------------------------|----------------------------|---------------|---------------------------|-------------|---------------------------|--------------|----------------------------|--------------|
| Age at diagnosis               | 1.02 (0.98 – 1.06)         | 0.38          | 1.00 (0.95 – 1.05)        | 0.88        | 1.01 (0.96 – 1.07)        | 0.18         | 0.99 (0.94 – 1.06)         | 0.91         |
| Sex                            | 0.73 (0.36 – 1.48)         | 0.39          | --                        | --          | --                        | --           | --                         | --           |
| BMI (kg/m <sup>2</sup> )       | 0.95 (0.88 – 1.02)         | 0.16          | --                        | --          | --                        | --           | --                         | --           |
| Smoking Pack years             | 1.01 (0.99 – 1.02)         | 0.06          | --                        | --          | --                        | --           | --                         | --           |
| 6MWD (m)                       | 0.99 (0.99 – 0.99)*        | 0.048*        | --                        | --          | --                        | --           | --                         | --           |
| Borg Dyspnea                   | 1.09 (0.93 – 1.28)         | 0.29          | --                        | --          | --                        | --           | --                         | --           |
| Oxygen Use                     | 2.90 (1.12 – 7.51)*        | 0.028*        | --                        | --          | 2.49 (0.51 – 12.1)        | 0.26         | --                         | --           |
| FEV1 % predicted               | 1.00 (0.98 – 1.02)         | 0.65          | 0.99 (0.97 – 1.02)        | 0.52        | --                        | --           | --                         | --           |
| FVC % predicted                | 1.00 (0.99 – 1.02)         | 0.83          | --                        | --          | --                        | --           | --                         | --           |
| FEV1/FVC %                     | 1.01 (0.99 – 1.04)         | 0.33          | --                        | --          | --                        | --           | --                         | --           |
| RV % predicted                 | 0.99 (0.99 – 1.00)         | 0.19          | --                        | --          | --                        | --           | --                         | --           |
| <b>KCO % predicted</b>         | <b>0.97 (0.96 – 0.99)*</b> | <b>0.008*</b> | <b>0.98 (0.96 – 0.99)</b> | <b>0.05</b> | <b>0.98 (0.96 – 1.00)</b> | <b>0.076</b> | <b>0.98 (0.96 – 1.00)*</b> | <b>0.08*</b> |
| NT-proBNP <sup>†</sup> (pg/dL) | 2.51 (1.32 – 4.79)*        | 0.005*        | --                        | --          | --                        | --           | 1.08 (0.75 – 1.56)         | 0.68         |
| Cr (mg/dL)                     | 1.37 (0.46 – 4.09)         | 0.58          | --                        | --          | --                        | --           | --                         | --           |
| mPAP (mmHg)                    | 1.02 (1.00 – 1.06)*        | 0.03*         | --                        | --          | --                        | --           | --                         | --           |
| PVR (Wood units)               | 1.07 (1.01 – 1.14)*        | 0.02*         | 1.04 (0.94 – 1.15)        | 0.42        | 1.02 (0.93 – 1.12)        | 0.69         | 1.00 (0.88 – 1.15)         | 0.91         |
| Cardiac Output (L/min)         | 0.76 (0.58 – 0.99)*        | 0.045*        | --                        | --          | --                        | --           | --                         | --           |
| PCWP (mmHg)                    | 0.95 (0.89 – 1.02)         | 0.15          | --                        | --          | --                        | --           | --                         | --           |
| PH Medication Use              | 1.85 (0.84 – 4.09)         | 0.13          | --                        | --          | --                        | --           | --                         | --           |

Model 1 (N=44) included age at diagnosis, FEV1% predicted, KCO% predicted, and PVR as covariates. Model 2 (N=44) included age at diagnosis, oxygen use, KCO% predicted, and PVR. Model 3 (N=32) included age at diagnosis, KCO % predicted, NT-proBNP, and PVR.

\*Denotes statistical significance  $p < 0.05$ . <sup>†</sup>NT-proBNP was log<sub>10</sub>-transformed for normality. Hazard ratios are reported per 1 unit increase in clinical predictor; sex hazard ratio is for females vs males, NT-proBNP is per 10-fold increase in pg/mL. HR = hazard ratio, BMI = body mass index, 6MWD = six-minute walk distance, FEV1 = forced expiratory volume in 1 second, FVC = forced vital capacity, RV = residual volume, KCO = gas transfer efficiency, Cr = creatinine, mPAP = mean pulmonary arterial pressure, PVR = pulmonary vascular resistance, PCWP = pulmonary capillary wedge pressure, PH = pulmonary hypertension

**e-Table 6.** Adjusted Transplant-free Survival excluding individuals with PCWP>15mmHg

|                                | Model 1                   | p-value       | Model 2                   | p-value      | Model 3                   | p-value     |
|--------------------------------|---------------------------|---------------|---------------------------|--------------|---------------------------|-------------|
| Age at diagnosis               | 1.09 (1.03 – 1.17)        | 0.005*        | 1.09 (1.02 – 1.16)        | 0.008*       | 1.08 (1.01 – 1.15)        | 0.02*       |
| Oxygen Use                     | --                        | --            | 1.22 (0.35 – 4.19)        | 0.32         | --                        | --          |
| FEV1 % predicted               | 0.99 (0.97 – 1.01)        | 0.42          | --                        | --           | --                        | --          |
| <b>DLCO % predicted</b>        | <b>0.97 (0.94 – 0.99)</b> | <b>0.008*</b> | <b>0.97 (0.94 – 0.99)</b> | <b>0.03*</b> | <b>0.97 (0.94 – 1.00)</b> | <b>0.05</b> |
| NT-proBNP <sup>†</sup> (pg/dL) | --                        | --            | --                        | --           | 0.93 (0.57 – 1.52)        | 0.78        |
| PVR (Wood units)               | 1.03 (0.94 – 1.12)        | 0.58          | 1.03 (0.94 – 1.12)        | 0.59         | 1.05 (0.94 – 1.16)        | 0.39        |

Model 1 (N=40) included age at diagnosis, FEV1% predicted, DLCO% predicted, and PVR as covariates.

Model 2 (N=40) included age at diagnosis, oxygen use, DLCO% predicted, and PVR. Model 3 (N=27)

included age at diagnosis, DLCO % predicted, NT-proBNP, and PVR.

\*Denotes statistical significance  $p < 0.05$ . <sup>†</sup>NT-proBNP was  $\log_{10}$ -transformed for normality. Hazard ratios are reported per 1 unit increase in clinical predictor; sex hazard ratio is for females vs males, NT-proBNP is per 10-fold increase in pg/mL. *FEV1* = forced expiratory volume in 1 second, *DLCO* = diffusing capacity of the lung for carbon monoxide, *PVR* = pulmonary vascular resistance, *PCWP* = pulmonary capillary wedge pressure

**e-Figure 1.** Mortality by DLCO Clinical Categories

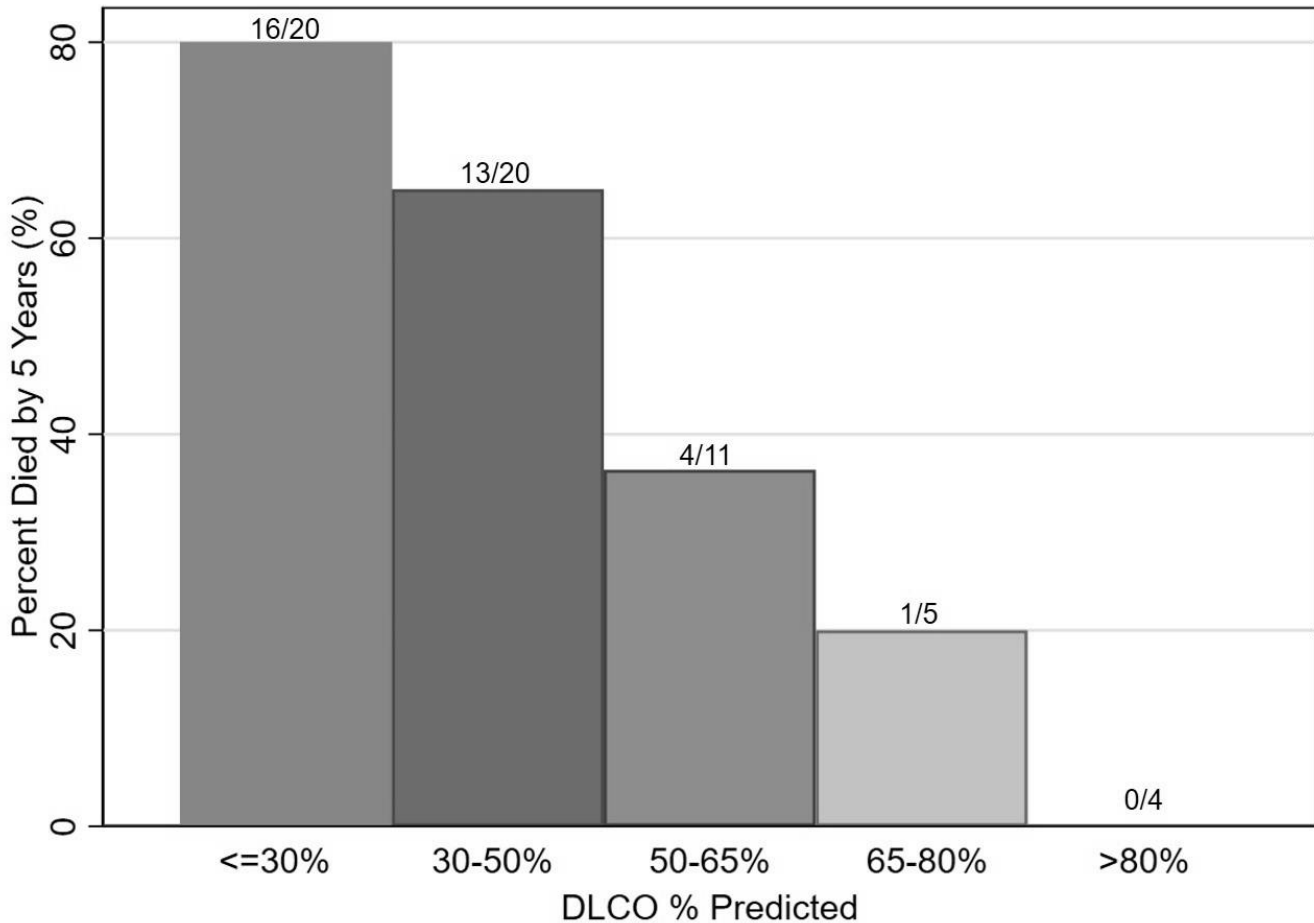

Percentage of patients in each DLCO group who had died by 5 years. Groups defined as DLCO≤30% (N=20), 30-50% (N=20), 50-65% (N=11), 65-80% predicted (N=5), and >80% predicted (N=4). Numbers above each bar represents absolute number dead/total in each group. Groups were identified by clinically utilized severity classification at Johns Hopkins. *DLCO = diffusing capacity of the lung for carbon monoxide*
